# Supplementary material
Source: Research Square preprint supplement (doi:10.21203/rs.3.rs-8756168/v1)

**Supplementary Information**

Cardiomyocyte-specific lamin A re-expression via AAV-*Lmna*/DJ8 ameliorates cardiac dysfunction in Lmna⁻/⁻ mice

**Supplemental Methods**

**Immunohistochemistry**

Heart specimens were fixed with 10% neutral-buffered formalin, embedded in paraffin, and sectioned at a thickness of 3 µm.After deparaffinization and rehydration, tissue sections were blocked for 1 hour at room temperature with Tris-buffered saline containing 0.1% Tween-20 (TBST) supplemented with 4% normal donkey Serum (Sigma-Aldrich, St. Louis, MO) and 2% bovine serum albumin. Sections were then incubated with primary antibodies overnight at 4°C. After washing with TBST, goat anti-rabbit IgG-Alexa Fluor 594 (1:1000, A-11012, Thermo Fisher Scientific, Waltham, MA) was used as the secondary antibody. Sections were mounted using ProLong Gold antifade reagent with 4’6-diamidino-2-phenylindole (DAPI) (P36935, Thermo Fisher Scientific). As a negative control, tissues were processed in parallel using normal rabbit IgG (10500C, Thermo Fisher Scientific) instead of the specific primary antibody.

**Supplemental Figure Legends**

**Figure S1. Lamin A protein expression in cardiomyocytes.**

Lamin A protein expression in cardiomyocytes from AAV-*Lmna*/DJ8-treated and PBS-treated *Lmna-/-* mice was analyzed by western blotting using an anti-lamin A/C antibody. Molecular weight markers are indicated on the left. Among AAV-*Lmna*/DJ8-treated Lmna⁻/⁻ mice, lanes labeled as AAV-*Lmna* +L and +H represent individual mice exhibiting relatively low and high levels of cardiac *Lmna* mRNA expression, respectively, as determined by qPCR analysis shown in Figure 1. All mice received the same dose of AAV-*Lmna*/DJ8. In Lmna⁺/⁻ and WT mice, lamin C (~65 kDa) was also detected. TBP, TATA-binding protein, was used as a loading control.

**Figure S2. Lamin A localization in cardiomyocytes of AAV-*Lmna*/DJ8-treated *Lmna*-/- mice.**

Representative immunofluorescence images of lamin A in myocardial cross-sections from PBS-treated WT, PBS-treated *Lmna-/-*, and AAV-*Lmna*/DJ8-treated *Lmna-/-* mice. Merged images (right panels) show lamin A staining (red) localized along the nuclear membrane, with nuclei counterstained with DAPI (blue). Scale bars, 30 μm.

**Figure S3. Doublet detection by over-clustering methods.**
**(A)** UMAP plot of nuclei from all samples (WT, *Lmna*⁻/⁻ + PBS, *Lmna*⁻/⁻ + AAV-*Lmna*/DJ8) before doublet removal. Over-clustering at a resolution of 1 identified several potential doublet clusters (e.g., clusters 18, 21, 22, 23, 25, 27, and 29).
**(B)** Marker gene expression patterns supporting the identification of these doublet clusters.

**Figure S4.** **Whole-nucleus population and major cell-type annotation.**
**(A)** UMAP projection of nuclei from all samples, colored by major cell types. Cell-type annotations were determined based on canonical marker gene expression.
**(B)** Dot plots showing the expression of canonical marker genes for cardiomyocytes and other major cardiac cell types.

**Figure S5. Subclustering analysis of cardiomyocyte nuclei.**
**(A)** UMAP plot showing the subpopulation of cardiomyocytes.
**(B)** Dot plots showing the expression of canonical marker genes for cardiomyocytes and other cardiac cell types to detect the potential doublet clusters.

**Figure S6. UMAP feature plots of gene expression in cardiomyocytes.**UMAP feature plots showing the expression of key genes involved in oxidative metabolism and cardiomyocyte function, including *Lmna*, *Ndufa10*, *Myh6*, and *Atp2a2*.


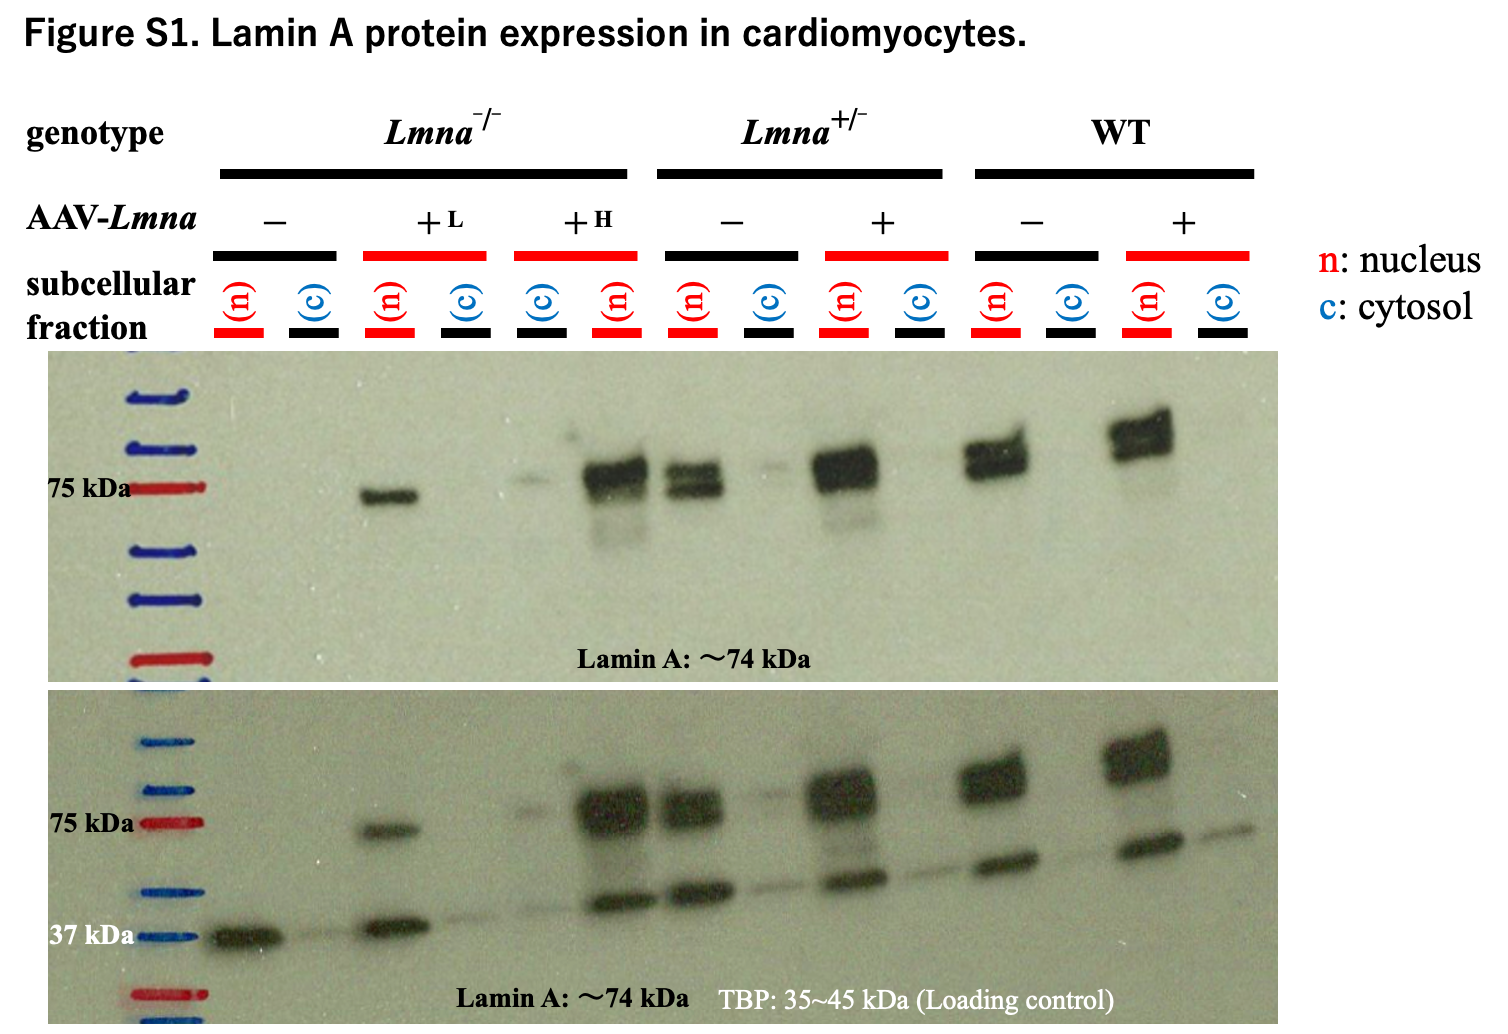


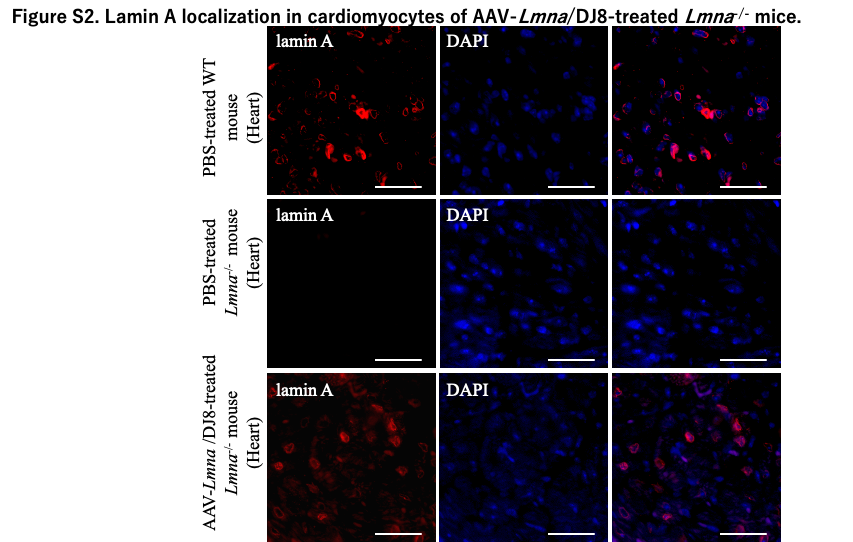


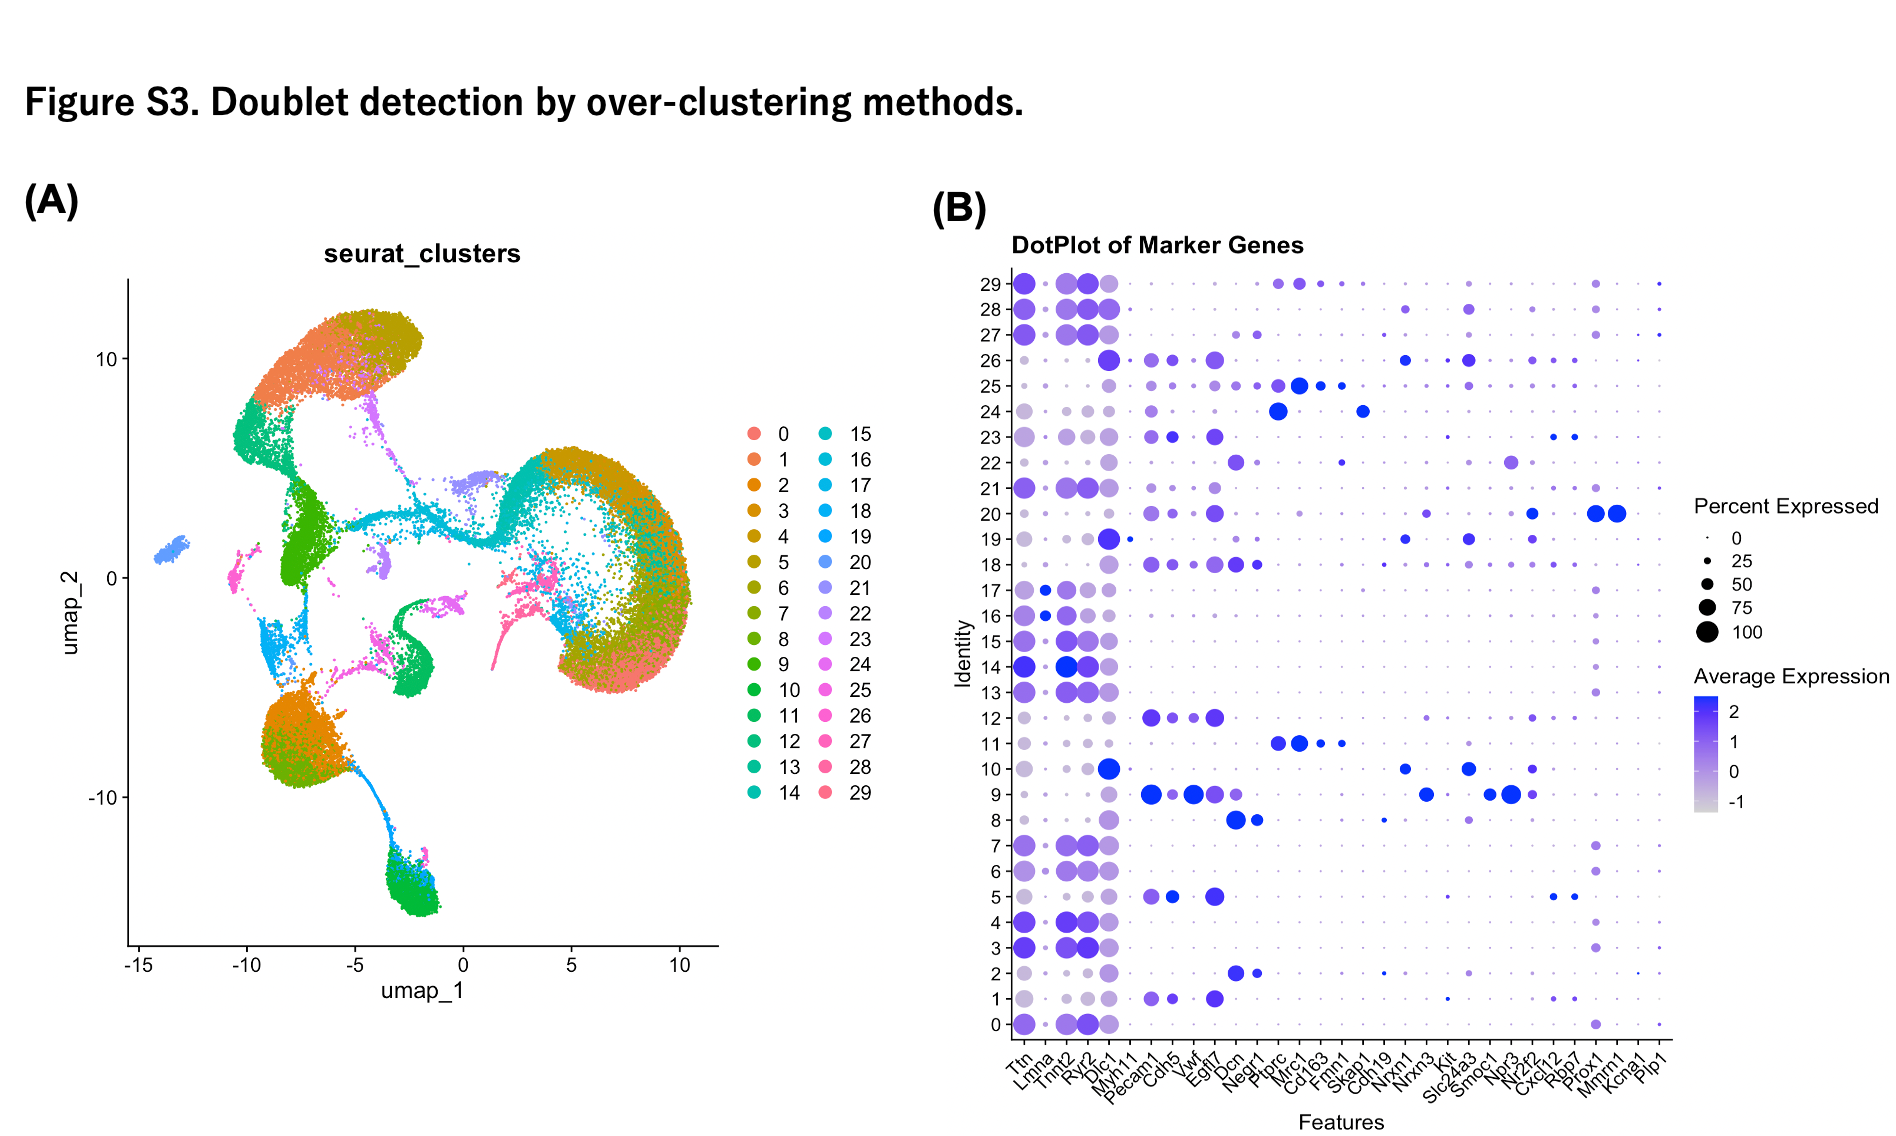


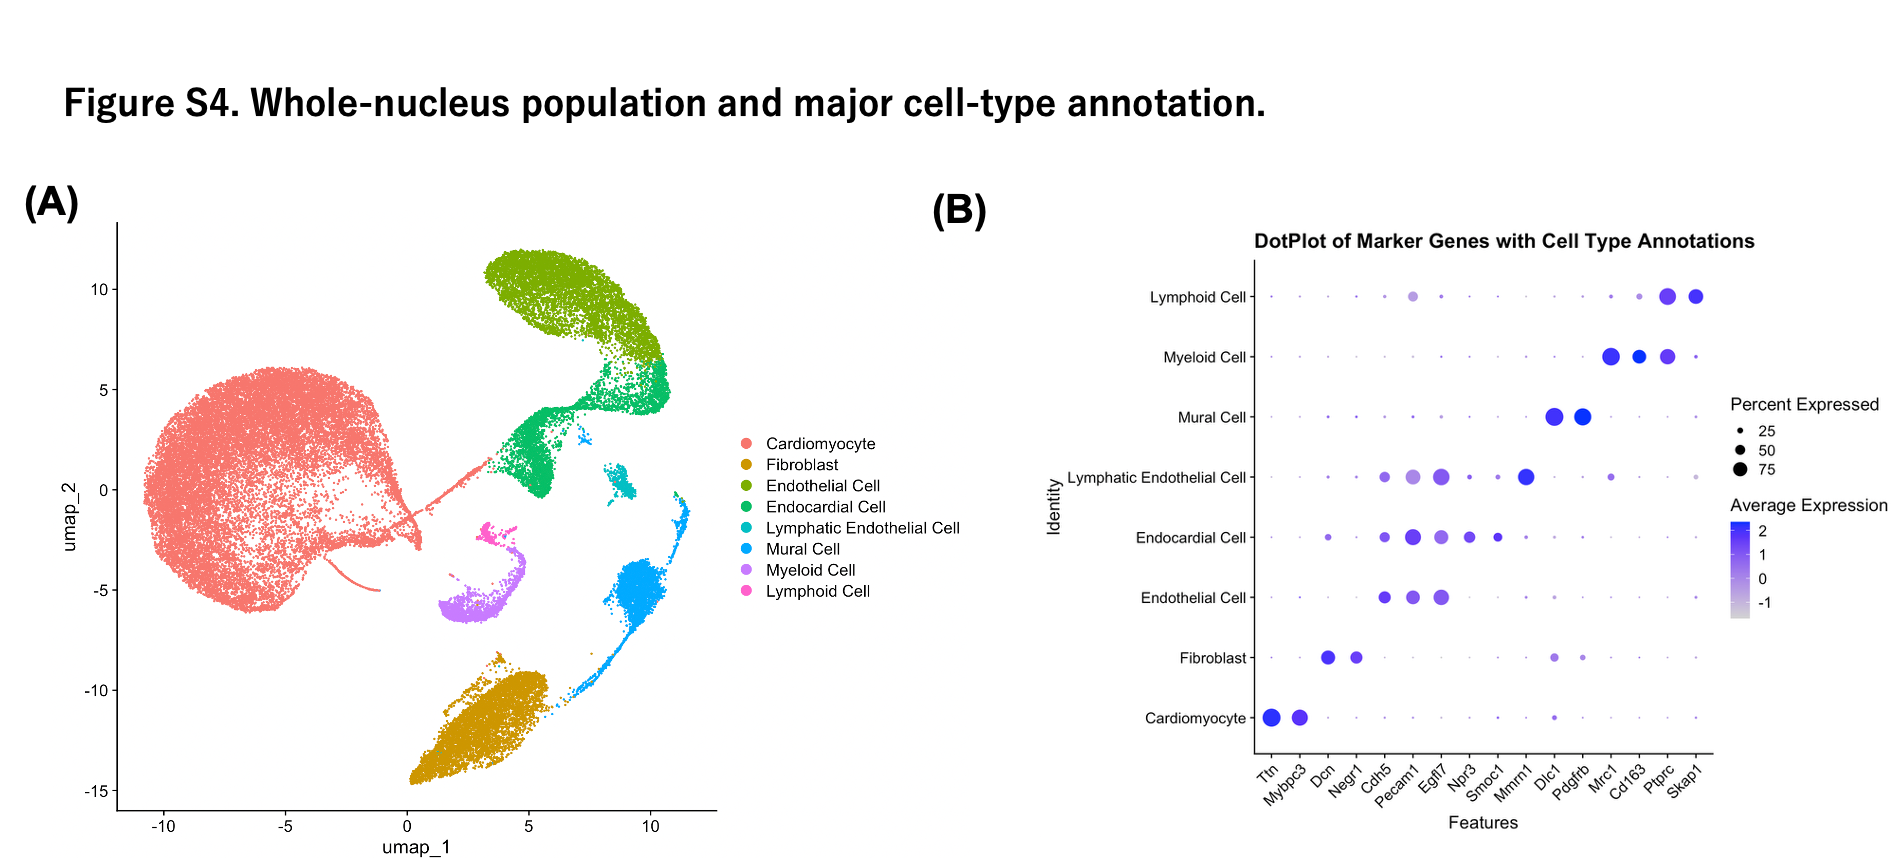


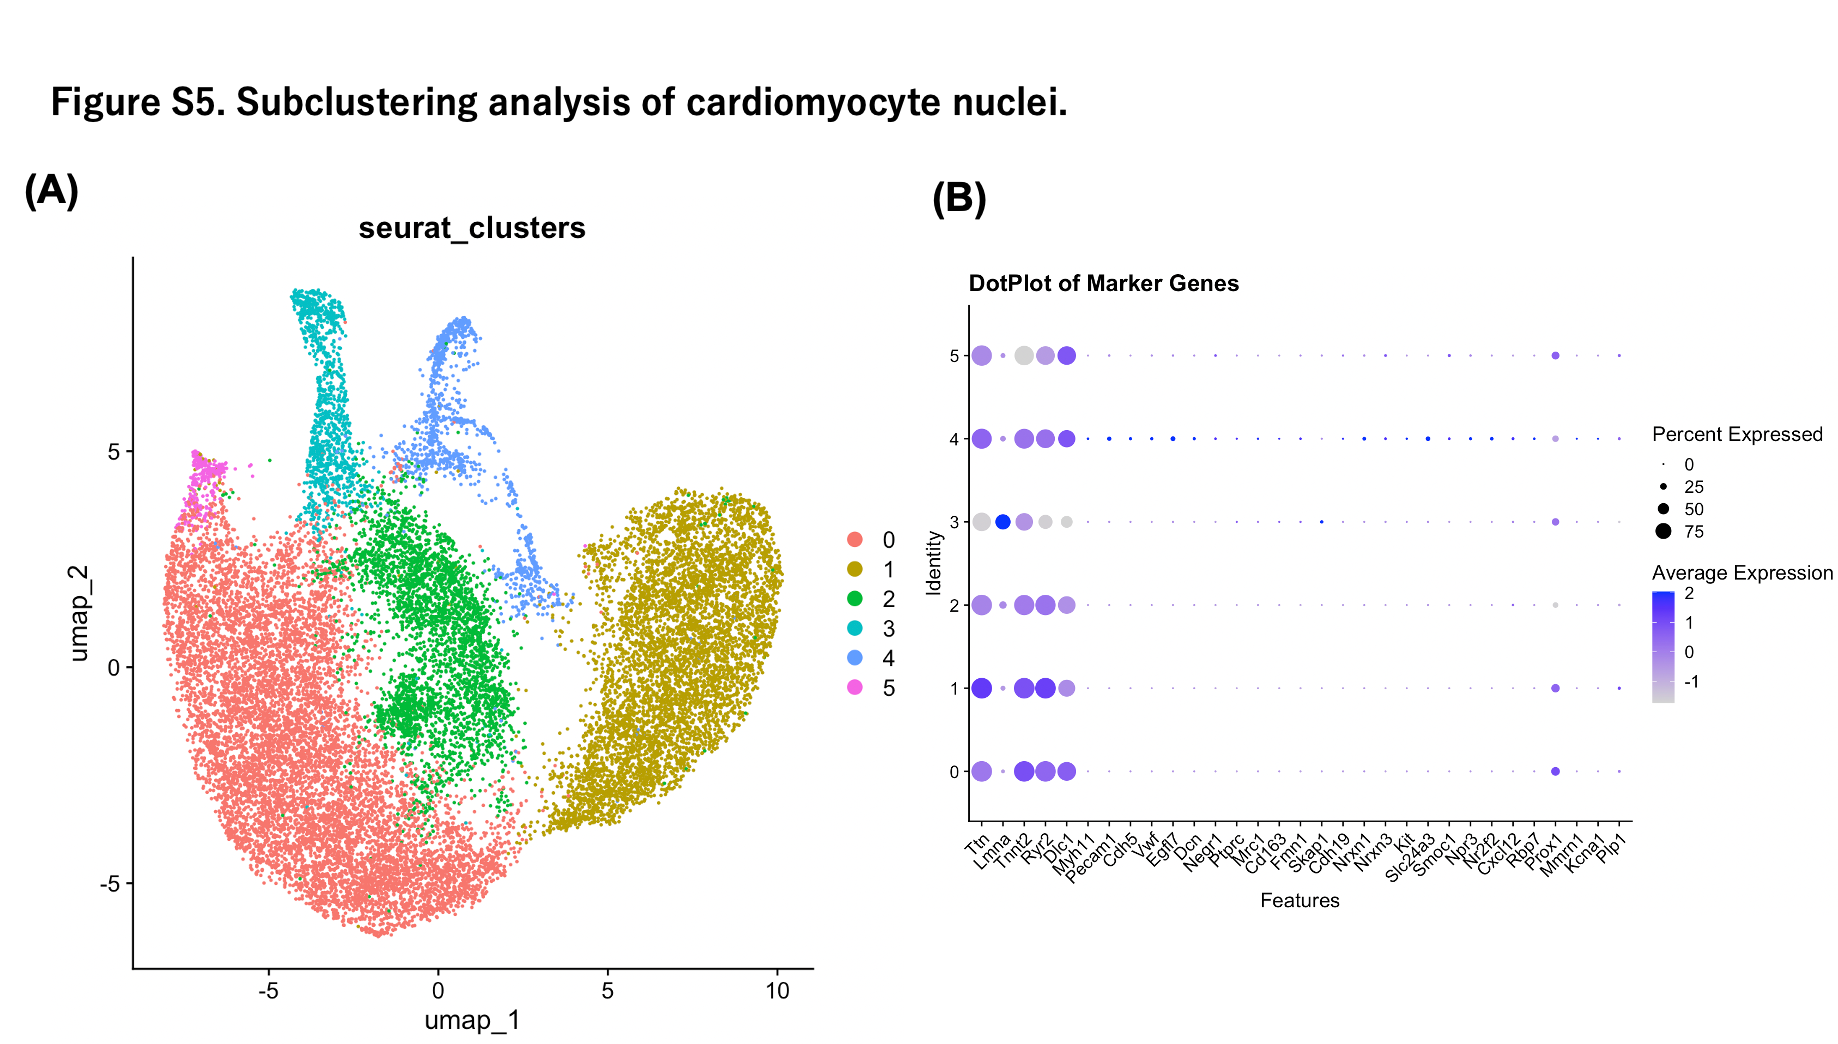


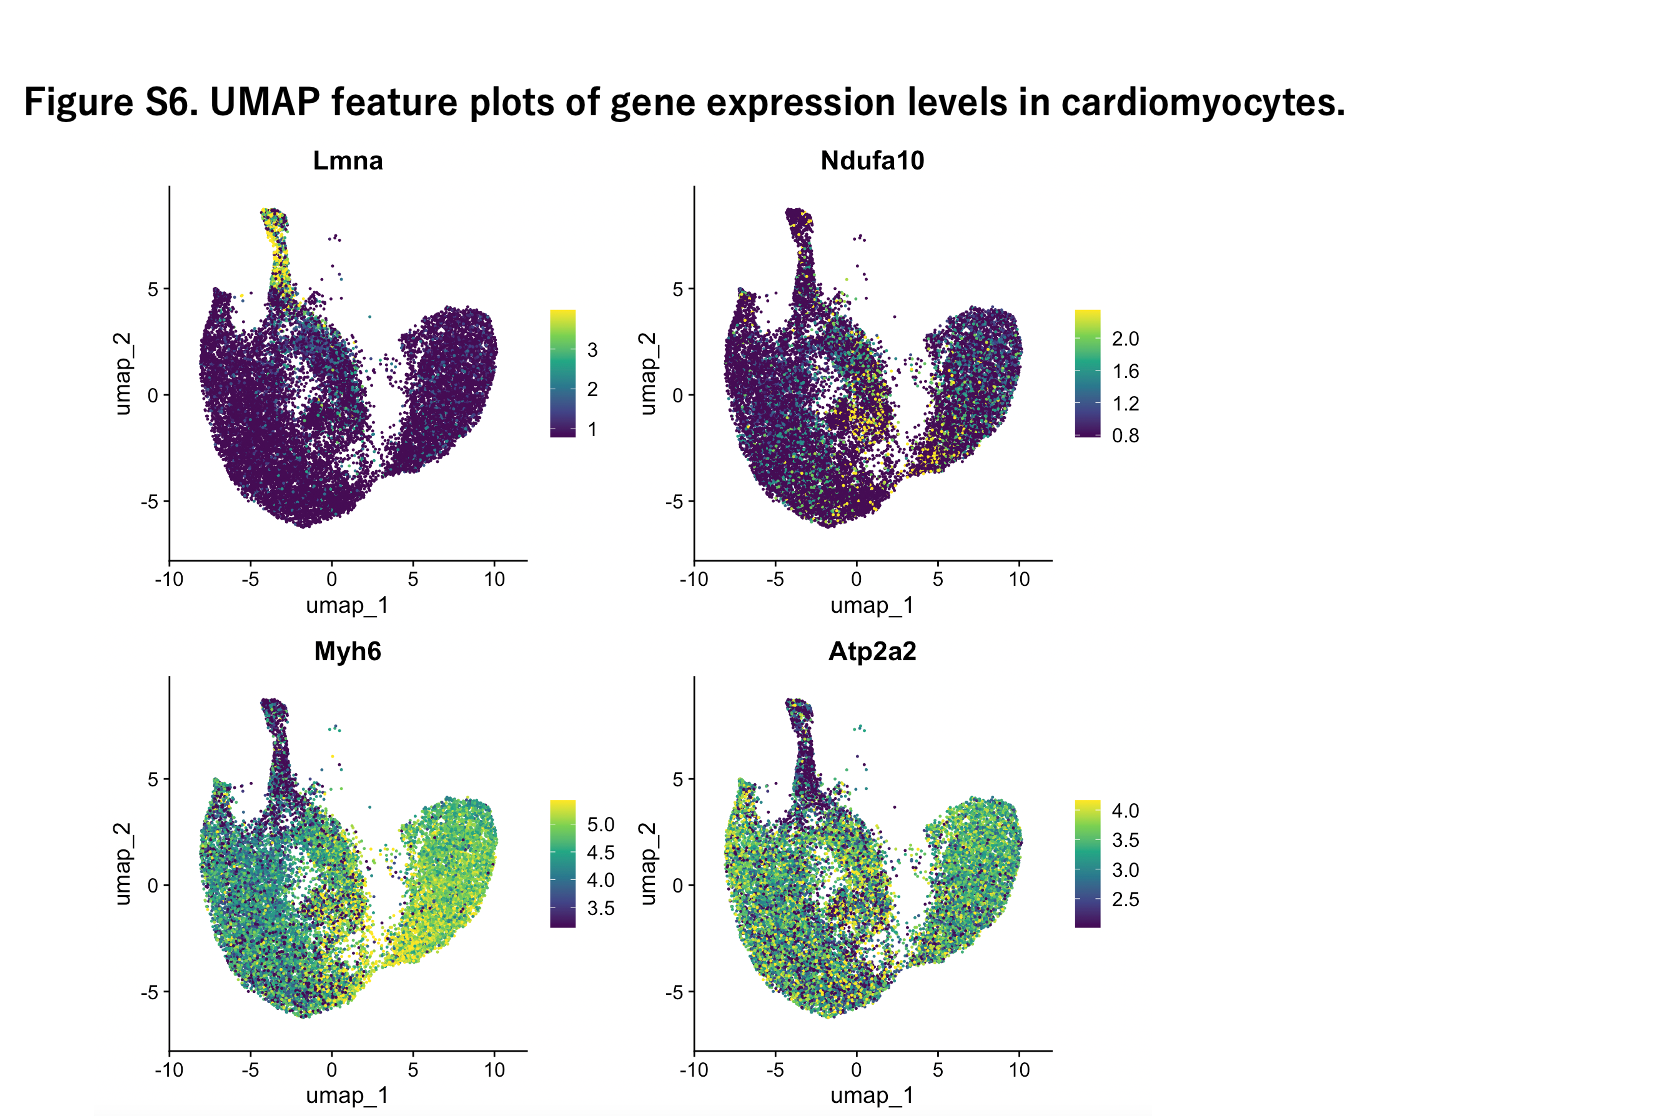

Supplement: Supplementary file 1 [file d2f3a0d29b08c5f1de0cc2b4.docx]
